# Supplementary material
Source: ML conference proceedings conference paper supplement (https://proceedings.mlr.press/v119/wang20a.html)
Supplement: Supplementary file [file wang20a-supp.pdf]

Supplementary material for  
**Logistic Regression for Massive Data with Rare Events**

In this section, we prove all theoretical results in the paper. To facilitate the presentation of the proofs, denote

$$a_n = \sqrt{ne^{\alpha n t}}.$$

The condition that  $\mathbb{E}(e^{t\|\mathbf{x}\|}) < \infty$  for any  $t > 0$  implies that

$$\mathbb{E}(e^{t_1\|\mathbf{x}\|}\|\mathbf{z}\|^{t_2}) < \infty, \tag{S.1}$$

for any  $t_1 > 0$  and  $t_2 > 0$ , and we will use this result multiple times in the proof. The inequality in (S.1) is true because for any  $t_1 > 0$  and  $t_2 > 0$ , we can choose  $t > t_1$  and  $k > t_2$  so that

$$e^{t\|\mathbf{x}\|} \geq e^{-t}e^{t\|\mathbf{z}\|} = e^{-t}e^{t_1\|\mathbf{z}\|}e^{(t-t_1)\|\mathbf{z}\|} \geq \frac{(t-t_1)^k e^{-t}}{k!} e^{t_1\|\mathbf{x}\|}\|\mathbf{z}\|^k \geq \frac{(t-t_1)^k e^{-t}}{k!} e^{t_1\|\mathbf{x}\|}\|\mathbf{z}\|^{t_2},$$

with probability one.

## S.1 Proof of Theorem 1

*Proof of Theorem 1.* The estimator  $\hat{\boldsymbol{\theta}}$  is the maximizer of

$$\ell(\boldsymbol{\theta}) = \sum_{i=1}^n [(\alpha + \mathbf{x}_i^T \boldsymbol{\beta})y_i - \log\{1 + \exp(\alpha + \mathbf{x}_i^T \boldsymbol{\beta})\}], \tag{S.2}$$

so  $\mathbf{u}_n = a_n(\hat{\boldsymbol{\theta}} - \boldsymbol{\theta}_{nt})$  is the maximizer of

$$\gamma(\mathbf{u}) = \ell(\boldsymbol{\theta}_{nt} + a_n^{-1}\mathbf{u}) - \ell(\boldsymbol{\theta}_{nt}). \tag{S.3}$$

By Taylor's expansion,

$$\gamma(\mathbf{u}) = a_n^{-1}\mathbf{u}^T \dot{\ell}(\boldsymbol{\theta}_{nt}) + 0.5a_n^{-2} \sum_{i=1}^n \phi_i(\boldsymbol{\theta}_{nt} + a_n^{-1}\mathbf{u})(\mathbf{z}_i^T \mathbf{u})^2, \tag{S.4}$$

where  $\phi_i(\boldsymbol{\theta}) = p_i(\alpha, \boldsymbol{\beta})\{1 - p_i(\alpha, \boldsymbol{\beta})\}$ ,

$$\dot{\ell}(\boldsymbol{\theta}) = \frac{\partial \ell(\boldsymbol{\theta})}{\partial \boldsymbol{\theta}} = \sum_{i=1}^n \{y_i - p_i(\boldsymbol{\theta})\}\mathbf{z}_i = \sum_{i=1}^n \{y_i - p_i(\alpha, \boldsymbol{\beta})\}\mathbf{z}_i$$

is the gradient of  $\ell(\boldsymbol{\theta})$ , and  $\hat{\mathbf{u}}$  lies between  $\mathbf{0}$  and  $\mathbf{u}$ . If we can show that

$$a_n^{-1}\dot{\ell}(\boldsymbol{\theta}_{nt}) \longrightarrow \mathbb{N}(\mathbf{0}, \mathbf{M}_f), \quad (\text{S.5})$$

in distribution, and for any  $\mathbf{u}$ ,

$$a_n^{-2} \sum_{i=1}^n \phi_i(\boldsymbol{\theta}_{nt} + a_n^{-1}\hat{\mathbf{u}})\mathbf{z}_i\mathbf{z}_i^T \longrightarrow \mathbf{M}_f, \quad (\text{S.6})$$

in probability, then from the Basic Corollary in page 2 of Hjort & Pollard (2011), we know that  $a_n(\hat{\boldsymbol{\theta}} - \boldsymbol{\theta}_{nt})$ , the maximizer of  $\gamma(\mathbf{u})$ , satisfies that

$$a_n(\hat{\boldsymbol{\theta}} - \boldsymbol{\theta}_{nt}) = \mathbf{M}_f^{-1} \times a_n^{-1}\dot{\ell}(\boldsymbol{\theta}_{nt}) + o_P(1). \quad (\text{S.7})$$

Slutsky's theorem together with (S.5) and (S.7) implies the result in Theorem 1. We prove (S.5) and (S.6) in the following.

Note that

$$\dot{\ell}(\boldsymbol{\theta}_{nt}) = \sum_{i=1}^n \{y_i - p_i(\alpha_{nt}, \boldsymbol{\beta}_t)\}\mathbf{z}_i, \quad (\text{S.8})$$

is a summation of i.i.d. quantities. Since  $\alpha_{nt} \rightarrow -\infty$  as  $n \rightarrow \infty$ , the distribution of  $\{y - p(\alpha_{nt}, \boldsymbol{\beta}_t)\}\mathbf{z}$  depends on  $n$ , we need to use a central limit theorem for triangular arrays. The Lindeberg-Feller central limit theorem (see, Section \*2.8 of van der Vaart, 1998) is appropriate.

We exam the mean and variance of  $a_n^{-1}\dot{\ell}(\boldsymbol{\theta}_{nt})$ . For the mean, from the fact that

$$\mathbb{E}[\{y_i - p_i(\alpha_{nt}, \boldsymbol{\beta}_t)\}\mathbf{z}_i] = \mathbb{E}[\mathbb{E}\{y_i - p_i(\alpha_{nt}, \boldsymbol{\beta}_t)|\mathbf{z}_i\}\mathbf{z}_i] = \mathbf{0},$$

we know that  $\mathbb{E}\{a_n^{-1}\dot{\ell}(\boldsymbol{\theta}_{nt})\} = \mathbf{0}$ .

For the variance,

$$\begin{aligned} \mathbb{V}\{a_n^{-1}\dot{\ell}(\boldsymbol{\theta}_{nt})\} &= a_n^{-2} \sum_{i=1}^n \mathbb{V}[\{y_i - p_i(\alpha_{nt}, \boldsymbol{\beta}_t)\}\mathbf{z}_i] = a_n^{-2}n\mathbb{E}\{\phi(\boldsymbol{\theta}_{nt})\mathbf{z}\mathbf{z}^T\} \\ &= a_n^{-2}n\mathbb{E}\left\{\frac{e^{\alpha_{nt} + \boldsymbol{\beta}_t^T \mathbf{x}}\mathbf{z}\mathbf{z}^T}{(1 + e^{\alpha_{nt} + \boldsymbol{\beta}_t^T \mathbf{x}})^2}\right\} = \mathbb{E}\left\{\frac{e^{\boldsymbol{\beta}_t^T \mathbf{x}}\mathbf{z}\mathbf{z}^T}{(1 + e^{\alpha_{nt} + \boldsymbol{\beta}_t^T \mathbf{x}})^2}\right\}. \end{aligned}$$

Note that

$$\frac{e^{\boldsymbol{\beta}_t^T \mathbf{x}}\mathbf{z}\mathbf{z}^T}{(1 + e^{\alpha_{nt} + \boldsymbol{\beta}_t^T \mathbf{x}})^2} \longrightarrow e^{\boldsymbol{\beta}_t^T \mathbf{x}}\mathbf{z}\mathbf{z}^T,$$

almost surely, and

$$\frac{e^{\boldsymbol{\beta}_t^T \mathbf{x}}\|\mathbf{z}\|^2}{(1 + e^{\alpha_{nt} + \boldsymbol{\beta}_t^T \mathbf{x}})^2} \leq e^{\boldsymbol{\beta}_t^T \mathbf{x}}\|\mathbf{z}\|^2 \quad \text{with} \quad \mathbb{E}(e^{\boldsymbol{\beta}_t^T \mathbf{x}}\|\mathbf{z}\|^2) \leq \infty.$$

Thus, from the dominated convergence theorem,

$$\mathbb{V}\{a_n^{-1}\dot{\ell}(\boldsymbol{\theta}_{nt})\} = \mathbb{E}\left\{\frac{e^{\boldsymbol{\beta}_t^\top \mathbf{x} \mathbf{z} \mathbf{z}^\top}}{(1 + e^{\alpha_{nt} + \boldsymbol{\beta}_t^\top \mathbf{x}})^2}\right\} \longrightarrow \mathbb{E}(e^{\boldsymbol{\theta}_{nt}^\top \mathbf{x} \mathbf{z} \mathbf{z}^\top}).$$

Now we check the Lindeberg-Feller condition. For any  $\epsilon > 0$ ,

$$\begin{aligned} & \sum_{i=1}^n \mathbb{E}\left[\|\{y_i - p_i(\alpha_{nt}, \boldsymbol{\beta}_t)\}\mathbf{z}_i\|^2 I(\|\{y_i - p_i(\alpha_{nt}, \boldsymbol{\beta}_t)\}\mathbf{z}_i\| > a_n \epsilon)\right] \\ &= n \mathbb{E}\left[\|\{y - p(\boldsymbol{\theta}_{nt})\}\mathbf{z}\|^2 I(\|\{y - p(\boldsymbol{\theta}_{nt})\}\mathbf{z}\| > a_n \epsilon)\right] \\ &= n \mathbb{E}\left[p(\boldsymbol{\theta}_{nt})\{1 - p(\boldsymbol{\theta}_{nt})\}^2 \|\mathbf{z}\|^2 I(\|\{1 - p(\boldsymbol{\theta}_{nt})\}\mathbf{z}\| > a_n \epsilon)\right] \\ &\quad + n \mathbb{E}\left[\{1 - p(\boldsymbol{\theta}_{nt})\}\{p(\boldsymbol{\theta}_{nt})\}^2 \|\mathbf{z}\|^2 I(\|p(\boldsymbol{\theta}_{nt})\mathbf{z}\| > a_n \epsilon)\right] \\ &\leq n \mathbb{E}\left[p(\boldsymbol{\theta}_{nt})\|\mathbf{z}\|^2 I(\|\mathbf{z}\| > a_n \epsilon)\right] + n \mathbb{E}\left[\{p(\boldsymbol{\theta}_{nt})\}^2 \|\mathbf{z}\|^2 I(\|p(\boldsymbol{\theta}_{nt})\mathbf{z}\| > a_n \epsilon)\right] \\ &\leq a_n^2 \mathbb{E}\{e^{\|\boldsymbol{\beta}_t\| \|\mathbf{x}\|} \|\mathbf{z}\|^2 I(\|\mathbf{z}\| > a_n \epsilon)\} + a_n^2 \mathbb{E}\{e^{\|\boldsymbol{\beta}_t\| \|\mathbf{x}\|} \|\mathbf{z}\|^2 I(\|\mathbf{z}\| > a_n \epsilon)\} \\ &= o(a_n^2), \end{aligned}$$

where the last step is from the dominated convergence theorem. Thus, applying the Lindeberg-Feller central limit theorem (Section \*2.8 of van der Vaart, 1998), we finish the proof of (S.5).

The last step is to prove (S.6). We first show that

$$\begin{aligned} & \left| a_n^{-2} \sum_{i=1}^n \phi_i(\boldsymbol{\theta}_{nt} + a_n^{-1} \dot{\mathbf{u}}) \|\mathbf{z}_i\|^2 - a_n^{-2} \sum_{i=1}^n \phi_i(\boldsymbol{\theta}_{nt}) \|\mathbf{z}_i\|^2 \right| \\ & \leq a_n^{-2} \sum_{i=1}^n |\phi_i(\boldsymbol{\theta}_{nt} + a_n^{-1} \dot{\mathbf{u}}) - \phi_i(\boldsymbol{\theta}_{nt})| \|\mathbf{z}_i\|^2 \\ & \leq \|a_n^{-1} \dot{\mathbf{u}}\| a_n^{-2} \sum_{i=1}^n p_i(\boldsymbol{\theta}_{nt} + a_n^{-1} \check{\mathbf{u}}) \|\mathbf{z}_i\|^3 \\ & = \frac{\|a_n^{-1} \dot{\mathbf{u}}\|}{n} \sum_{i=1}^n \frac{e^{\mathbf{x}_i^\top \boldsymbol{\beta}_t + a_n^{-1} \check{\mathbf{u}}^\top \mathbf{z}_i}}{\{1 + e^{\boldsymbol{\theta}_{nt}^\top \mathbf{z}_i + a_n^{-1} \check{\mathbf{u}}^\top \mathbf{z}_i}\}^2} \|\mathbf{z}_i\|^3 \\ & \leq \frac{\|a_n^{-1} \dot{\mathbf{u}}\|}{n} \sum_{i=1}^n e^{(\|\boldsymbol{\beta}_t\| + \|\mathbf{u}\|)(1 + \|\mathbf{x}_i\|)} \|\mathbf{z}_i\|^3 = o_P(1). \end{aligned} \tag{S.9}$$

Here, the last inequality in (S.9) is because  $\check{\mathbf{u}}$  lies between  $\mathbf{0}$  and  $\dot{\mathbf{u}}$ , and thus  $\|a_n^{-1} \check{\mathbf{u}}\| \leq \|\mathbf{u}\|$  for  $a_n \geq 1$ .

To finish the proof, we only need to prove that

$$a_n^{-2} \sum_{i=1}^n \phi_i(\boldsymbol{\theta}_{nt}) \mathbf{z}_i \mathbf{z}_i^\top \longrightarrow \mathbb{E}(e^{\boldsymbol{\beta}_t^\top \mathbf{x} \mathbf{z} \mathbf{z}^\top}), \tag{S.10}$$

in probability. This is done by noting that

$$a_n^{-2} \sum_{i=1}^n \phi_i(\boldsymbol{\theta}_{nt}) \mathbf{z}_i \mathbf{z}_i^\top = \frac{1}{n e^{\alpha_{nt}}} \sum_{i=1}^n \frac{e^{\boldsymbol{\theta}_{nt}^\top \mathbf{z}_i}}{(1 + e^{\boldsymbol{\theta}_{nt}^\top \mathbf{z}_i})^2} \mathbf{z}_i \mathbf{z}_i^\top \tag{S.11}$$

$$= \frac{1}{n} \sum_{i=1}^n \frac{e^{\mathbf{x}_i^T \boldsymbol{\beta}_t}}{(1 + e^{\boldsymbol{\theta}_{nt}^T \mathbf{z}_i})^2} \mathbf{z}_i \mathbf{z}_i^T = \mathbb{E}(e^{\boldsymbol{\beta}_t^T \mathbf{x}} \mathbf{z} \mathbf{z}^T) + o_P(1), \quad (\text{S.12})$$

by Proposition 1 of Wang (2019). □

## S.2 Proof of Theorem 2

*Proof of Theorem 2.* The estimator  $\hat{\boldsymbol{\theta}}_{\text{under}}^w$  is the maximizer of  $\ell_{\text{under}}^w(\boldsymbol{\theta})$  defined in (10), so  $\sqrt{a_n}(\hat{\boldsymbol{\theta}}_{\text{under}}^w - \boldsymbol{\theta}_t)$  is the maximizer of  $\gamma_{\text{under}}^w(\mathbf{u}) = \ell_{\text{under}}^w(\boldsymbol{\theta}_{nt} + a_n^{-1}\mathbf{u}) - \ell_{\text{under}}^w(\boldsymbol{\theta}_{nt})$ . By Taylor's expansion,

$$\gamma_{\text{under}}^w(\mathbf{u}) = \frac{1}{a_n} \mathbf{u}^T \dot{\ell}_{\text{under}}^w(\boldsymbol{\theta}_{nt}) + \frac{1}{2a_n^2} \sum_{i=1}^n \frac{\delta_i}{\pi_i} \phi_i(\boldsymbol{\theta}_{nt} + a_n^{-1}\dot{\mathbf{u}}) (\mathbf{z}_i^T \mathbf{u})^2, \quad (\text{S.13})$$

where

$$\dot{\ell}_{\text{under}}^w(\boldsymbol{\theta}) = \frac{\partial \ell_{\text{under}}^w(\boldsymbol{\theta})}{\partial \boldsymbol{\theta}} = \sum_{i=1}^n \frac{\delta_i}{\pi_i} \{y_i - p_i(\boldsymbol{\theta})\} \mathbf{z}_i = \sum_{i=1}^n \frac{\delta_i}{\pi_i} \{y_i - p_i(\alpha, \boldsymbol{\beta})\} \mathbf{z}_i$$

is the gradient of  $\ell_{\text{under}}^w(\boldsymbol{\theta})$ , and  $\dot{\mathbf{u}}$  lies between  $\mathbf{0}$  and  $\mathbf{u}$ . Similarly to the proof of Theorem 1, we only need to show that

$$a_n^{-1} \dot{\ell}_{\text{under}}^w(\boldsymbol{\theta}_{nt}) \longrightarrow \mathbb{N}\left[\mathbf{0}, \mathbb{E}\{e^{\boldsymbol{\beta}_t^T \mathbf{x}} (1 + ce^{\boldsymbol{\beta}_t^T \mathbf{x}}) \mathbf{z} \mathbf{z}^T\}\right], \quad (\text{S.14})$$

in distribution, and for any  $\mathbf{u}$ ,

$$a_n^{-2} \sum_{i=1}^n \frac{\delta_i}{\pi_i} \phi_i(\boldsymbol{\theta}_{nt} + a_n^{-1}\dot{\mathbf{u}}) \mathbf{z}_i \mathbf{z}_i^T \longrightarrow \mathbb{E}(e^{\boldsymbol{\beta}_t^T \mathbf{x}} \mathbf{z} \mathbf{z}^T), \quad (\text{S.15})$$

in probability.

We prove (S.14) first. Recall that  $\mathcal{D}_n$  is the full data set and  $\delta_i = y_i + (1 - y_i)I(u_i \leq \pi_0)$ , satisfying that

$$\pi_i = \mathbb{E}(\delta_i | \mathcal{D}_n) = y_i + (1 - y_i)\pi_0 = \pi_0 + (1 - \pi_0)y_i.$$

We notice that

$$\mathbb{E}(\delta_i | \mathbf{z}_i) = p_i(\alpha_{nt}, \boldsymbol{\beta}_t) + \{1 - p_i(\alpha_{nt}, \boldsymbol{\beta}_t)\}\pi_0 = \pi_0 + (1 - \pi_0)p_i(\alpha_{nt}, \boldsymbol{\beta}_t).$$

Let  $\eta_i = \frac{\delta_i}{\pi_i} \{y_i - p_i(\boldsymbol{\theta}_{nt})\} \mathbf{z}_i$ , we know that  $\eta_i$ ,  $i = 1, \dots, n$ , are i.i.d., with the underlying distribution of  $\eta_i$  being dependent on  $n$ . From direct calculation, we have

$$\begin{aligned} \mathbb{E}(\eta_i | \mathbf{z}_i) &= \mathbf{0}, \quad \text{and} \\ \mathbb{V}(\eta_i | \mathbf{z}_i) &= \mathbb{E}\left[\frac{\{y_i - p_i(\boldsymbol{\theta}_{nt})\}^2}{\pi_0 + y_i(1 - \pi_0)} \middle| \mathbf{z}_i\right] \mathbf{z}_i \mathbf{z}_i^T \\ &= [p_i(\boldsymbol{\theta}_{nt})\{1 - p_i(\boldsymbol{\theta}_{nt})\}^2 + \pi_0^{-1}\{1 - p_i(\boldsymbol{\theta}_{nt})\}\{p_i(\boldsymbol{\theta}_{nt})\}^2] \mathbf{z}_i \mathbf{z}_i^T \\ &= \{1 - p_i(\boldsymbol{\theta}_{nt}) + \pi_0^{-1}p_i(\boldsymbol{\theta}_{nt})\} p_i(\boldsymbol{\theta}_{nt}) \{1 - p_i(\boldsymbol{\theta}_{nt})\} \mathbf{z}_i \mathbf{z}_i^T \end{aligned}$$

$$\begin{aligned}
&= \frac{1 + \pi_0^{-1} e^{\alpha_{nt} + \mathbf{x}_i^T \boldsymbol{\beta}_t}}{(1 + e^{\alpha_{nt} + \mathbf{x}_i^T \boldsymbol{\beta}_t})^2} p_i(\boldsymbol{\theta}_{nt}) \mathbf{z}_i \mathbf{z}_i^T \\
&\leq e^{\alpha_{nt}} (1 + \pi_0^{-1} e^{\alpha_{nt}} e^{\mathbf{x}_i^T \boldsymbol{\beta}_t}) e^{\mathbf{x}_i^T \boldsymbol{\beta}_t} \mathbf{z}_i \mathbf{z}_i^T.
\end{aligned}$$

Thus, by the dominated convergence theorem, we obtain that

$$\mathbb{V}(\eta_i) = \mathbb{E}\{\mathbb{V}(\eta_i | \mathbf{z}_i)\} = e^{\alpha_{nt}} \mathbb{E}\left\{e^{\mathbf{x}_i^T \boldsymbol{\beta}_t} (1 + c e^{\mathbf{x}_i^T \boldsymbol{\beta}_t}) \mathbf{z}_i \mathbf{z}_i^T\right\} \{1 + o(1)\}. \quad (\text{S.16})$$

Now we check the Lindeberg-Feller condition (Section \*2.8 of van der Vaart, 1998). For simplicity, let  $\pi = \pi_0 + (1 - \pi_0)y$  and  $\delta = y + (1 - y)I(u \leq \pi)$ , where  $u \sim \mathbb{U}(0, 1)$ . For any  $\epsilon > 0$ ,

$$\begin{aligned}
&\sum_{i=1}^n \mathbb{E}\{\|\eta_i\|^2 I(\|\eta_i\| > a_n \epsilon)\} \\
&= n \mathbb{E}[\|\pi^{-1} \delta \{y - p(\boldsymbol{\theta}_{nt})\} \mathbf{z}\|^2 I(\|\pi^{-1} \delta \{y - p(\boldsymbol{\theta}_{nt})\} \mathbf{z}\| > a_n \epsilon)] \\
&= \pi_0 n \mathbb{E}[\|\pi^{-1} \{y - p(\boldsymbol{\theta}_{nt})\} \mathbf{z}\|^2 I(\|\pi^{-1} \{y - p(\boldsymbol{\theta}_{nt})\} \mathbf{z}\| > a_n \epsilon)] \\
&\quad + (1 - \pi_0) n \mathbb{E}[\pi^{-1} \|y \{y - p(\boldsymbol{\theta}_{nt})\} \mathbf{z}\|^2 I(\|\pi^{-1} y \{y - p(\boldsymbol{\theta}_{nt})\} \mathbf{z}\| > a_n \epsilon)] \\
&= \pi_0 n \mathbb{E}[p(\boldsymbol{\theta}_{nt}) \|\{1 - p(\boldsymbol{\theta}_{nt})\} \mathbf{z}\|^2 I(\|\{1 - p(\boldsymbol{\theta}_{nt})\} \mathbf{z}\| > a_n \epsilon)] \\
&\quad + \pi_0^{-1} n \mathbb{E}[\{1 - p(\boldsymbol{\theta}_{nt})\} \|p(\boldsymbol{\theta}_{nt}) \mathbf{z}\|^2 I(\pi_0^{-1} \|p(\boldsymbol{\theta}_{nt}) \mathbf{z}\| > a_n \epsilon)] \\
&\quad + (1 - \pi_0) n \mathbb{E}[p(\boldsymbol{\theta}_{nt}) \|\{1 - p(\boldsymbol{\theta}_{nt})\} \mathbf{z}\|^2 I(\|\{1 - p(\boldsymbol{\theta}_{nt})\} \mathbf{z}\| > a_n \epsilon)] \\
&\leq n \mathbb{E}\{p(\boldsymbol{\theta}_{nt}) \|\mathbf{z}\|^2 I(\|\mathbf{z}\| > a_n \epsilon)\} + n \pi_0^{-1} \mathbb{E}\{\|p(\boldsymbol{\theta}_{nt}) \mathbf{z}\|^2 I(\|\pi_0^{-1} p(\boldsymbol{\theta}_{nt}) \mathbf{z}\| > a_n \epsilon)\} \\
&\leq n e^{\alpha_{nt}} \mathbb{E}\{e^{\boldsymbol{\beta}_t^T \mathbf{x}} \|\mathbf{z}\|^2 I(\|\mathbf{z}\| > a_n \epsilon)\} + n \pi_0^{-1} e^{2\alpha_{nt}} \mathbb{E}\{e^{\boldsymbol{\beta}_t^T \mathbf{x}} \|\mathbf{z}\|^2 I(\pi_0^{-1} e^{\alpha_{nt}} \|\mathbf{z}\| > a_n \epsilon)\} \\
&= o(n e^{\alpha_{nt}}) = o(a_n^2),
\end{aligned}$$

where the second last step is from the dominated convergence theorem and the facts that  $a_n \rightarrow \infty$  and  $\lim_{n \rightarrow \infty} e^{\alpha}/\pi_0 = c < \infty$ . Thus, applying the Lindeberg-Feller central limit theorem (Section \*2.8 of van der Vaart, 1998) finishes the proof of (S.14).

Now we prove (S.15). By direct calculation, we first notice that

$$\Delta_1 \equiv a_n^{-2} \sum_{i=1}^n \frac{\delta_i}{\pi_i} \phi_i(\boldsymbol{\theta}_{nt}) \mathbf{z}_i \mathbf{z}_i^T = \frac{1}{n} \sum_{i=1}^n \frac{\{y_i + (1 - y_i)I(u_i \leq \pi_0)\} e^{\mathbf{x}_i^T \boldsymbol{\beta}_t}}{\pi_i (1 + e^{\alpha_{nt} + \mathbf{x}_i^T \boldsymbol{\beta}_t})^2} \mathbf{z}_i \mathbf{z}_i^T \quad (\text{S.17})$$

has a mean of

$$\mathbb{E}(\Delta_1) = \mathbb{E}\left\{\frac{e^{\boldsymbol{\beta}_t^T \mathbf{x}}}{(1 + e^{\alpha_{nt} + \boldsymbol{\beta}_t^T \mathbf{x}})^2} \mathbf{z} \mathbf{z}^T\right\} = \mathbb{E}(e^{\boldsymbol{\beta}_t^T \mathbf{x}} \mathbf{z} \mathbf{z}^T) + o(1), \quad (\text{S.18})$$

where the last step is by the dominated convergence theorem. In addition, the variance of each component of  $\Delta_1$  is bounded by

$$\frac{1}{n} \mathbb{E}\left\{\frac{e^{2\boldsymbol{\beta}_t^T \mathbf{x}} \|\mathbf{z}\|^4}{\pi (1 + e^{\alpha_{nt} + \boldsymbol{\beta}_t^T \mathbf{x}})^4}\right\} \leq \frac{\mathbb{E}(e^{2\boldsymbol{\beta}_t^T \mathbf{x}} \|\mathbf{z}\|^4)}{n \pi_0} = o(1), \quad (\text{S.19})$$

where the last step is because  $ne^{\alpha_{nt}} \rightarrow \infty$  and  $e^{\alpha_{nt}}/\pi_0 \rightarrow c < \infty$  imply that  $n\pi_0 \rightarrow \infty$ . From (S.18) and (S.19), Chebyshev's inequality implies that  $\Delta_1 \rightarrow \mathbb{E}(e^{\beta_t^T \mathbf{x} \mathbf{z} \mathbf{z}^T})$  in probability. Notice that

$$\begin{aligned} & \left| a_n^{-2} \sum_{i=1}^n \frac{\delta_i}{\pi_i} \phi_i(\boldsymbol{\theta}_{nt} + a_n^{-1} \dot{\mathbf{u}}) \|\mathbf{z}_i\|^2 - a_n^{-2} \sum_{i=1}^n \frac{\delta_i}{\pi_i} \phi_i(\boldsymbol{\theta}_{nt}) \|\mathbf{z}_i\|^2 \right| \\ & \leq \|a_n^{-1} \dot{\mathbf{u}}\| a_n^{-2} \sum_{i=1}^n \frac{\delta_i}{\pi_i} p_i(\boldsymbol{\theta}_{nt} + a_n^{-1} \dot{\mathbf{u}}) \|\mathbf{z}_i\|^3 \\ & \leq \|a_n^{-1} \dot{\mathbf{u}}\| \times \frac{1}{n} \sum_{i=1}^n \frac{\delta_i}{\pi_i} e^{(\|\beta_t\| + \|\mathbf{u}\|) \|\mathbf{z}_i\|} \|\mathbf{z}_i\|^3 \equiv \|a_n^{-1} \dot{\mathbf{u}}\| \times \Delta_2. \end{aligned}$$

Since  $\|a_n^{-1} \dot{\mathbf{u}}\| \rightarrow 0$ , to finish the proof of (S.15), we only need to prove that  $\Delta_2$  is bounded in probability. Using an approach similar to (S.18) and (S.19), we can show that  $\Delta_2$  has a mean that is bounded and a variance that converges to zero.  $\square$

### S.3 Proof of Theorem 3

*Proof of Theorem 3.* If we use  $\Upsilon_{bc}$  to denote the under-sampled objective function shifted by  $\mathbf{b}$ , i.e.,  $\Upsilon_{bc}(\boldsymbol{\theta}) = \ell_{\text{under}}^{\mathbf{u}}(\boldsymbol{\theta} - \mathbf{b})$ , then the estimator  $\hat{\boldsymbol{\theta}}_{\text{under}}^{\text{ubc}}$  is the maximizer of

$$\Upsilon_{bc}(\boldsymbol{\theta}) = \sum_{i=1}^n \delta_i [(\boldsymbol{\theta} - \mathbf{b})^T \mathbf{z}_i y_i - \log\{1 + e^{(\boldsymbol{\theta} - \mathbf{b})^T \mathbf{z}_i}\}]. \quad (\text{S.20})$$

We notice that  $\sqrt{a_n}(\hat{\boldsymbol{\theta}}_{\text{under}}^{\text{ubc}} - \boldsymbol{\theta}_{nt})$  is the maximizer of  $\gamma_{bc}(\mathbf{u}) = \Upsilon_{bc}(\boldsymbol{\theta}_{nt} + a_n^{-1} \mathbf{u}) - \Upsilon_{bc}(\boldsymbol{\theta}_{nt})$ . By Taylor's expansion,

$$\gamma_p(\mathbf{u}) = \frac{1}{a_n} \mathbf{u}^T \dot{\Upsilon}_{bc}(\boldsymbol{\theta}_{nt}) + \frac{1}{2a_n^2} \sum_{i=1}^n \delta_i \phi_i(\boldsymbol{\theta}_{nt} - \mathbf{b} + a_n^{-1} \dot{\mathbf{u}}) (\mathbf{z}_i^T \mathbf{u})^2, \quad (\text{S.21})$$

where

$$\dot{\Upsilon}_{bc}(\boldsymbol{\theta}) = \frac{\partial \Upsilon_{bc}(\boldsymbol{\theta})}{\partial \boldsymbol{\theta}} = \sum_{i=1}^n \delta_i \{y_i - p_i(\boldsymbol{\theta}_{nt} - \mathbf{b})\} \mathbf{z}_i = \sum_{i=1}^n \delta_i \{y_i - p_i(\alpha_{nt} - b, \beta_t)\} \mathbf{z}_i$$

is the gradient of  $\Upsilon_{bc}(\boldsymbol{\theta})$ , and  $\dot{\mathbf{u}}$  lies between  $\mathbf{0}$  and  $\mathbf{u}$ .

Similarly to the proof of Theorem 1, we only need to show that

$$a_n^{-1} \dot{\Upsilon}_{bc}(\boldsymbol{\theta}_{nt}) \longrightarrow \mathbb{N}\left\{\mathbf{0}, \mathbb{E}\left(\frac{e^{\beta_t^T \mathbf{x} \mathbf{z} \mathbf{z}^T}}{1 + ce^{\beta_t^T \mathbf{x}}}\right)\right\}, \quad (\text{S.22})$$

in distribution, and for any  $\mathbf{u}$ ,

$$a_n^{-2} \sum_{i=1}^n \delta_i \phi_i(\boldsymbol{\theta}_{nt} - \mathbf{b} + a_n^{-1} \dot{\mathbf{u}}) \mathbf{z}_i \mathbf{z}_i^T \longrightarrow \mathbb{E}\left(\frac{e^{\mathbf{x}_i^T \beta_t}}{1 + ce^{\mathbf{x}_i^T \beta_t}} \mathbf{z}_i \mathbf{z}_i^T\right) \quad (\text{S.23})$$

in probability.

We prove (S.22) first. Define  $\eta_{ui} = \delta_i \{y_i - p_i(\alpha_{nt} - b, \boldsymbol{\beta}_t)\} \mathbf{z}_i$ . We have that

$$\begin{aligned}\mathbb{E}(\eta_{ui} | \mathbf{z}_i) &= \mathbb{E}[\{\pi_0 + y_i(1 - \pi_0)\} \{y_i - p_i(\alpha_{nt} - b, \boldsymbol{\beta}_t)\} | \mathbf{z}_i] \mathbf{z}_i \\ &= [p_i(\alpha_{nt}, \boldsymbol{\beta}_t) \{1 - p_i(\alpha_{nt} - b, \boldsymbol{\beta}_t)\} - \pi_0 \{1 - p_i(\alpha_{nt}, \boldsymbol{\beta}_t)\} \{p_i(\alpha_{nt} - b, \boldsymbol{\beta}_t)\}] \mathbf{z}_i = 0,\end{aligned}$$

which implies that  $\mathbb{E}(\eta_{ui}) = \mathbf{0}$ . For the conditional variance

$$\begin{aligned}\mathbb{V}(\eta_{ui} | \mathbf{z}_i) &= \mathbb{E}[\{\pi_0 + y_i(1 - \pi_0)\} \{y_i - p_i(\alpha_{nt} - b, \boldsymbol{\beta}_t)\}^2 | \mathbf{z}_i] \mathbf{z}_i \mathbf{z}_i^\top \\ &= [p_i(\alpha_{nt}, \boldsymbol{\beta}_t) \{1 - p_i(\alpha_{nt} - b, \boldsymbol{\beta}_t)\}^2 + \pi_0 \{1 - p_i(\alpha_{nt}, \boldsymbol{\beta}_t)\} \{p_i(\alpha_{nt} - b, \boldsymbol{\beta}_t)\}^2] \mathbf{z}_i \mathbf{z}_i^\top \\ &= \frac{e^{\alpha_{nt} + \mathbf{x}_i^\top \boldsymbol{\beta}_t} + \pi_0 e^{2(\alpha_{nt} - b_0 + \mathbf{x}_i^\top \boldsymbol{\beta}_t)}}{(1 + e^{\alpha_{nt} + \mathbf{x}_i^\top \boldsymbol{\beta}_t})(1 + e^{\alpha_{nt} - b_0 + \mathbf{x}_i^\top \boldsymbol{\beta}_t})^2} \mathbf{z}_i \mathbf{z}_i^\top \\ &= \frac{e^{\alpha_{nt} + \mathbf{x}_i^\top \boldsymbol{\beta}_t}}{1 + e^{\alpha_{nt} - b_0 + \mathbf{x}_i^\top \boldsymbol{\beta}_t}} \{1 - p_i(\alpha_{nt}, \boldsymbol{\beta}_t)\} \mathbf{z}_i \mathbf{z}_i^\top \leq e^{\alpha_{nt}} e^{\mathbf{x}_i^\top \boldsymbol{\beta}_t} \mathbf{z}_i \mathbf{z}_i^\top,\end{aligned}$$

where  $e^{\mathbf{x}_i^\top \boldsymbol{\beta}_t} \mathbf{z}_i \mathbf{z}_i^\top$  is integrable. Thus, by the dominated convergence theorem,  $\mathbb{V}(\eta_{ui})$  satisfies that

$$\mathbb{V}(\eta_{ui}) = \mathbb{E}\{\mathbb{V}(\eta_{ui} | \mathbf{z}_i)\} = e^{\alpha_{nt}} \mathbb{E}\left(\frac{e^{\boldsymbol{\beta}_t^\top \mathbf{x}}}{1 + ce^{\boldsymbol{\beta}_t^\top \mathbf{x}}}\right) \{1 + o(1)\}. \quad (\text{S.24})$$

Therefore, we have

$$a_n^{-2} \sum_{i=1}^n \mathbb{V}(\eta_{ui}) \longrightarrow \mathbb{E}\left(\frac{e^{\boldsymbol{\beta}_t^\top \mathbf{x}}}{1 + ce^{\boldsymbol{\beta}_t^\top \mathbf{x}}} \mathbf{z} \mathbf{z}^\top\right). \quad (\text{S.25})$$

Now we check the Lindeberg-Feller condition. For any  $\epsilon > 0$ ,

$$\begin{aligned}& \sum_{i=1}^n \mathbb{E}\{\|\eta_{ui}\|^2 I(\|\eta_{ui}\| > a_n \epsilon)\} \\ &= n \mathbb{E}[\|\delta \{y - p(\boldsymbol{\theta}_{nt} - \mathbf{b})\} \mathbf{z}\|^2 I(\|\delta \{y - p(\boldsymbol{\theta}_{nt} - \mathbf{b})\} \mathbf{z}\| > a_n \epsilon)] \\ &= \pi_0 n \mathbb{E}[\|\{y - p(\boldsymbol{\theta}_{nt} - \mathbf{b})\} \mathbf{z}\|^2 I(\|\{y - p(\boldsymbol{\theta}_{nt} - \mathbf{b})\} \mathbf{z}\| > a_n \epsilon)] \\ &\quad + (1 - \pi_0) n \mathbb{E}[\|y \{y - p(\boldsymbol{\theta}_{nt} - \mathbf{b})\} \mathbf{z}\|^2 I(\|y \{y - p(\boldsymbol{\theta}_{nt} - \mathbf{b})\} \mathbf{z}\| > a_n \epsilon)] \\ &= \pi_0 n \mathbb{E}[p(\boldsymbol{\theta}_{nt}) \|\{1 - p(\boldsymbol{\theta}_{nt} - \mathbf{b})\} \mathbf{z}\|^2 I(\|\{1 - p(\boldsymbol{\theta}_{nt} - \mathbf{b})\} \mathbf{z}\| > a_n \epsilon)] \\ &\quad + \pi_0 n \mathbb{E}[\{1 - p(\boldsymbol{\theta}_{nt})\} \|p(\boldsymbol{\theta}_{nt} - \mathbf{b}) \mathbf{z}\|^2 I(\|p(\boldsymbol{\theta}_{nt} - \mathbf{b}) \mathbf{z}\| > a_n \epsilon)] \\ &\quad + (1 - \pi_0) n \mathbb{E}[p(\boldsymbol{\theta}_{nt}) \|\{1 - p(\boldsymbol{\theta}_{nt} - \mathbf{b})\} \mathbf{z}\|^2 I(\|\{1 - p(\boldsymbol{\theta}_{nt} - \mathbf{b})\} \mathbf{z}\| > a_n \epsilon)] \\ &\leq n \mathbb{E}\{p(\boldsymbol{\theta}_{nt}) \|\mathbf{z}\|^2 I(\|\mathbf{z}\| > a_n \epsilon)\} + \pi_0 n \mathbb{E}[\|p(\boldsymbol{\theta}_{nt} - \mathbf{b}) \mathbf{z}\|^2 I(\|\mathbf{z}\| > a_n \epsilon)] \\ &\leq n e^{\alpha_{nt}} \mathbb{E}\{e^{\boldsymbol{\beta}_t^\top \mathbf{x}} \|\mathbf{z}\|^2 I(\|\mathbf{z}\| > a_n \epsilon)\} + \pi_0^{-1} n e^{2\alpha_{nt}} \mathbb{E}\{e^{2\boldsymbol{\beta}_t^\top \mathbf{x}} \|\mathbf{z}\|^2 I(\|\mathbf{z}\| > a_n \epsilon)\} \\ &= o(n e^{\alpha_{nt}}) = o(a_n^2),\end{aligned}$$

where the second last step is from the dominated convergence theorem. Thus, applying the Lindeberg-Feller central limit theorem (Section \*2.8 of van der Vaart, 1998) finishes the proof of (S.22).

No we prove (S.23). First, letting

$$\Delta_3 \equiv a_n^{-2} \sum_{i=1}^n \delta_i \phi_i(\boldsymbol{\theta}_{nt} - \mathbf{b}) \mathbf{z}_i \mathbf{z}_i^\top = \frac{1}{n} \sum_{i=1}^n \frac{\{y_i + (1 - y_i)I(u_i \leq \pi_0)\} e^{-b_0 + \mathbf{x}_i^\top \boldsymbol{\beta}_t}}{\{1 + e^{\alpha_{nt} - b_0 + \mathbf{x}_i^\top \boldsymbol{\beta}_t}\}^2} \mathbf{z}_i \mathbf{z}_i^\top, \quad (\text{S.26})$$

the mean of  $\Delta_3$  satisfies that

$$\mathbb{E}(\Delta_3) = \mathbb{E} \left[ \frac{e^{\boldsymbol{\beta}_t^\top \mathbf{x}}}{\{1 + e^{\alpha_{nt} + \boldsymbol{\beta}_t^\top \mathbf{x}}\} \{1 + e^{\alpha_{nt} - b_0 + \boldsymbol{\beta}_t^\top \mathbf{x}}\}} \mathbf{z} \mathbf{z}^\top \right] = \mathbb{E} \left( \frac{e^{\boldsymbol{\beta}_t^\top \mathbf{x}}}{1 + ce^{\boldsymbol{\beta}_t^\top \mathbf{x}}} \mathbf{z} \mathbf{z}^\top \right) + o(1), \quad (\text{S.27})$$

by the dominated convergence theorem, and the variance of each component of  $\Delta_3$  is bounded by

$$\frac{1}{n} \mathbb{E} \left[ \frac{\{y + (1 - y)I(u \leq \pi_0)\} e^{-2b_0 + 2\boldsymbol{\beta}_t^\top \mathbf{x}}}{\{1 + e^{\alpha_{nt} - b_0 + \boldsymbol{\beta}_t^\top \mathbf{x}}\}^4} \|\mathbf{z}\|^4 \right] \leq \frac{\mathbb{E}(e^{2\boldsymbol{\beta}_t^\top \mathbf{x}} \|\mathbf{z}\|^4)}{n\pi_0} = o(1). \quad (\text{S.28})$$

Thus, Chebyshev's inequality implies that

$$\Delta_3 \longrightarrow \mathbb{E} \left( \frac{e^{\boldsymbol{\beta}_t^\top \mathbf{x}}}{1 + ce^{\boldsymbol{\beta}_t^\top \mathbf{x}}} \mathbf{z} \mathbf{z}^\top \right), \quad (\text{S.29})$$

in probability. Furthermore,

$$\begin{aligned} & \left| a_n^{-2} \sum_{i=1}^n \delta_i \phi_i(\boldsymbol{\theta}_{nt} - \mathbf{b} + a_n^{-1} \dot{\mathbf{u}}) \|\mathbf{z}_i\|^2 - a_n^{-2} \sum_{i=1}^n \delta_i \phi_i(\boldsymbol{\theta}_{nt} - \mathbf{b}) \|\mathbf{z}_i\|^2 \right| \\ & \leq \|a_n^{-1} \dot{\mathbf{u}}\| a_n^{-2} \sum_{i=1}^n \delta_i p_i(\boldsymbol{\theta}_{nt} - \mathbf{b} + a_n^{-1} \dot{\mathbf{u}}) \|\mathbf{z}_i\|^3 \\ & \leq \frac{\|a_n^{-1} \dot{\mathbf{u}}\|}{n} \sum_{i=1}^n \frac{\delta_i}{\pi_0} e^{(\|\boldsymbol{\beta}_t\| + \|\mathbf{u}\|)(1 + \|\mathbf{x}_i\|)} \|\mathbf{z}_i\|^3 \equiv \|a_n^{-1} \dot{\mathbf{u}}\| \times \Delta_4 = o_P(1), \end{aligned} \quad (\text{S.30})$$

where the last step is because  $\Delta_4$  is bounded in probability due to the fact that it has a mean that is bounded and a variance that converges to zero. Combing (S.29) and (S.30), (S.23) follows.  $\square$

## S.4 Proof of Proposition 1

*Proof of Proposition 1.* Let

$$\mathbf{g} = \frac{1}{\sqrt{h}} \{ \mathbb{E}(h^{-1} \mathbf{v} \mathbf{v}^\top) \}^{-1} \mathbf{v} - \sqrt{h} \{ \mathbb{E}(\mathbf{v} \mathbf{v}^\top) \}^{-1} \mathbf{v}.$$

Since  $\mathbf{g} \mathbf{g}^\top \geq \mathbf{0}$ , we have

$$\mathbf{0} \leq \mathbb{E}(\mathbf{g} \mathbf{g}^\top) = \{ \mathbb{E}(\mathbf{v} \mathbf{v}^\top) \}^{-1} \mathbb{E}(h \mathbf{v} \mathbf{v}^\top) \{ \mathbb{E}(\mathbf{v} \mathbf{v}^\top) \}^{-1} - \{ \mathbb{E}(h^{-1} \mathbf{v} \mathbf{v}^\top) \}^{-1},$$

which finishes the proof.  $\square$



## S.5 Proof of Theorem 4

*Proof of Theorem 4.* The estimator  $\hat{\boldsymbol{\theta}}_{\text{over}}^{\text{w}}$  is the maximizer of (20), so  $\sqrt{a_n}(\hat{\boldsymbol{\theta}}_{\text{over}}^{\text{w}} - \boldsymbol{\theta}_t)$  is the maximizer of  $\gamma_{\text{over}}^{\text{w}}(\mathbf{u}) = \ell_{\text{over}}^{\text{w}}(\boldsymbol{\theta}_{nt} + a_n^{-1}\mathbf{u}) - \ell_{\text{over}}^{\text{w}}(\boldsymbol{\theta}_{nt})$ . By Taylor's expansion,

$$\gamma_{\text{over}}^{\text{w}}(\mathbf{u}) = \frac{1}{a_n}\mathbf{u}^{\text{T}}\dot{\ell}_{\text{over}}^{\text{w}}(\boldsymbol{\theta}_{nt}) + \frac{1}{2a_n^2}\sum_{i=1}^n\frac{\tau_i}{w_i}\phi_i(\boldsymbol{\theta}_{nt} + a_n^{-1}\dot{\mathbf{u}})(\mathbf{z}_i^{\text{T}}\mathbf{u})^2, \quad (\text{S.31})$$

where

$$\dot{\ell}_{\text{over}}^{\text{w}}(\boldsymbol{\theta}) = \frac{\partial\ell_{\text{over}}^{\text{w}}(\boldsymbol{\theta})}{\partial\boldsymbol{\theta}} = \sum_{i=1}^n\frac{\tau_i}{w_i}\{y_i - p_i(\boldsymbol{\theta}_{nt})\}\mathbf{z}_i = \sum_{i=1}^n\frac{\tau_i}{w_i}\{y_i - p_i(\alpha_{nt} - b, \boldsymbol{\beta}_t)\}\mathbf{z}_i$$

is the gradient of  $\ell_{\text{over}}^{\text{w}}(\boldsymbol{\theta})$ , and  $\dot{\mathbf{u}}$  lies between  $\mathbf{0}$  and  $\mathbf{u}$ . Similarly to the proof of Theorem 1, we only need to show that

$$a_n^{-1}\dot{\ell}_{\text{over}}^{\text{w}}(\boldsymbol{\theta}_{nt}) \longrightarrow \mathbb{N}\left\{\mathbf{0}, \frac{(1+\lambda)^2 + \lambda}{(1+\lambda)^2}\mathbb{E}(e^{\boldsymbol{\beta}_t^{\text{T}}\mathbf{x}}\mathbf{z}\mathbf{z}^{\text{T}})\right\}, \quad (\text{S.32})$$

in distribution, and for any  $\mathbf{u}$ ,

$$a_n^{-2}\sum_{i=1}^n\frac{\tau_i}{w_i}\phi_i(\boldsymbol{\theta}_{nt} + a_n^{-1}\dot{\mathbf{u}})\mathbf{z}_i\mathbf{z}_i^{\text{T}} \longrightarrow \mathbb{E}(e^{\boldsymbol{\beta}_t^{\text{T}}\mathbf{x}}\mathbf{z}\mathbf{z}^{\text{T}}), \quad (\text{S.33})$$

in probability.

We prove (S.32) first. Denote  $\eta_{owi} = \tau_i w_i^{-1}\{y_i - p_i(\boldsymbol{\theta}_{nt})\}\mathbf{z}_i$ , so  $\eta_{owi}$ ,  $i = 1, \dots, n$ , are i.i.d. with the underlying distribution of  $\eta_{owi}$  being dependent on  $n$ . From direct calculation, we have

$$\begin{aligned} \mathbb{E}(\eta_{owi}|\mathbf{z}_i) &= \mathbf{0}, \quad \text{and} \\ \mathbb{V}(\eta_{owi}|\mathbf{z}_i) &= \mathbb{E}\left[\frac{\{y_i(3\lambda_n + \lambda_n^2) + 1\}\{y_i - p_i(\boldsymbol{\theta}_{nt})\}^2}{(1 + \lambda_n y_i)^2} \middle| \mathbf{z}_i\right] \mathbf{z}_i \mathbf{z}_i^{\text{T}} \\ &= \left[ p_i(\boldsymbol{\theta}_{nt})\{1 - p_i(\boldsymbol{\theta}_{nt})\}^2 \frac{(1 + \lambda_n)^2 + \lambda_n}{(1 + \lambda_n)^2} + \{1 - p_i(\boldsymbol{\theta}_{nt})\}\{p_i(\boldsymbol{\theta}_{nt})\}^2 \right] \mathbf{z}_i \mathbf{z}_i^{\text{T}} \\ &= \frac{(1 + \lambda_n)^2 + \lambda_n}{(1 + \lambda_n)^2} e^{\alpha_{nt}} e^{\boldsymbol{\beta}_t^{\text{T}}\mathbf{x}} \mathbf{z}_i \mathbf{z}_i^{\text{T}} \{1 + o_P(1)\}, \end{aligned}$$

where the  $o_P(1)$  is bounded. Thus, by the dominated convergence theorem, we obtain that

$$\mathbb{V}(\eta_{owi}) = \frac{(1 + \lambda)^2 + \lambda}{(1 + \lambda)^2} e^{\alpha_{nt}} \mathbb{E}(e^{\mathbf{x}^{\text{T}}\boldsymbol{\beta}_t} \mathbf{z}\mathbf{z}^{\text{T}}) \{1 + o(1)\}.$$

Now we check the Lindeberg-Feller condition (Section \*2.8 of van der Vaart, 1998). Let  $w = 1 + \lambda_n y$  and  $\tau = yv + 1$ , where  $v \sim \text{POI}(\lambda_n)$ . For any  $\epsilon > 0$ ,

$$\sum_{i=1}^n \mathbb{E}[\|\eta_{owi}\|^2 I(\|\eta_{owi}\| > a_n \epsilon)]$$

$$\begin{aligned}
&= n\mathbb{E}\left[\|w^{-1}\tau\{y - p(\boldsymbol{\theta}_{nt})\}\mathbf{z}\|^2 I(\|w^{-1}\tau\{y - p(\boldsymbol{\theta}_{nt})\}\mathbf{z}\| > a_n\epsilon)\right] \\
&\leq \frac{n}{a_n\epsilon}\mathbb{E}\left[\|w^{-1}\tau\{y - p(\boldsymbol{\theta}_{nt})\}\mathbf{z}\|^3\right] \\
&= \frac{n}{a_n\epsilon}\mathbb{E}\left[\frac{(1 + vy)^3}{(1 + \lambda_n y)^3}\{y - p(\boldsymbol{\theta}_{nt})\}^3\|\mathbf{z}\|^3\right] \\
&\leq \frac{n}{a_n\epsilon}\frac{1 + 7\lambda_n + 6\lambda_n^2 + \lambda_n^3}{(1 + \lambda_n)^3}\mathbb{E}\{p(\boldsymbol{\theta}_{nt})\|\mathbf{z}\|^3\} + \frac{n}{a_n\epsilon}\mathbb{E}\{[p(\boldsymbol{\theta}_{nt})]^3\|\mathbf{z}\|^3\} \\
&\leq \frac{a_n}{\epsilon}\frac{1 + 7\lambda_n + 6\lambda_n^2 + \lambda_n^3}{(1 + \lambda_n)^3}\mathbb{E}(e^{\mathbf{x}_i^T\boldsymbol{\beta}_t}\|\mathbf{z}\|^3) + \frac{a_n e^{2\alpha_{nt}}}{\epsilon}\mathbb{E}(e^{3\mathbf{x}_i^T\boldsymbol{\beta}_t}\|\mathbf{z}\|^3) = o(a_n^2).
\end{aligned}$$

Thus, applying the Lindeberg-Feller central limit theorem (Section \*2.8 of van der Vaart, 1998) finishes the proof of (S.32).

Now we prove (S.33). Let

$$\Delta_5 \equiv a_n^{-2}\sum_{i=1}^n \frac{\tau_i}{w_i}\phi_i(\boldsymbol{\theta}_{nt})\mathbf{z}_i\mathbf{z}_i^T = \frac{1}{n}\sum_{i=1}^n \frac{\tau_i}{w_i}\frac{e^{\mathbf{x}_i^T\boldsymbol{\beta}_t}}{(1 + e^{\alpha_{nt} + \mathbf{x}_i^T\boldsymbol{\beta}_t})^2}\mathbf{z}_i\mathbf{z}_i^T.$$

Since

$$\mathbb{E}(\Delta_5) = \mathbb{E}\left\{\frac{e^{\boldsymbol{\beta}_t^T\mathbf{x}}}{(1 + e^{\alpha_{nt} + \boldsymbol{\beta}_t^T\mathbf{x}})^2}\mathbf{z}\mathbf{z}^T\right\} = \mathbb{E}(e^{\boldsymbol{\beta}_t^T\mathbf{x}}\mathbf{z}\mathbf{z}^T) + o(1),$$

by the dominated convergence theorem, and each component of  $\Delta_5$  has a variance that is bounded by

$$\frac{1}{n}\mathbb{E}\left\{\frac{2e^{2\boldsymbol{\beta}_t^T\mathbf{x}}\|\mathbf{z}\|^4}{(1 + e^{\alpha_{nt} + \boldsymbol{\beta}_t^T\mathbf{x}})^4}\right\} \leq \frac{2\mathbb{E}(e^{2\boldsymbol{\beta}_t^T\mathbf{x}}\|\mathbf{z}\|^4)}{n} = o(1),$$

applying Chebyshev's inequality gives that

$$\Delta_5 \longrightarrow \mathbb{E}(e^{\boldsymbol{\beta}_t^T\mathbf{x}}\mathbf{z}\mathbf{z}^T),$$

in probability. Thus, (S.33) follows from the fact that

$$\begin{aligned}
&\left|a_n^{-2}\sum_{i=1}^n \frac{\tau_i}{w_i}\phi_i(\boldsymbol{\theta}_{nt} + a_n^{-1}\hat{\mathbf{u}})\|\mathbf{z}_i\|^2 - a_n^{-2}\sum_{i=1}^n \frac{\tau_i}{w_i}\phi_i(\boldsymbol{\theta}_{nt})\|\mathbf{z}_i\|^2\right| \\
&\leq \|a_n^{-1}\hat{\mathbf{u}}\|a_n^{-2}\sum_{i=1}^n \frac{\tau_i}{w_i}p_i(\boldsymbol{\theta}_{nt} + a_n^{-1}\check{\mathbf{u}})\|\mathbf{z}_i\|^3 \\
&\leq \frac{\|a_n^{-1}\hat{\mathbf{u}}\|}{n}\sum_{i=1}^n \frac{\tau_i}{w_i}e^{(\|\boldsymbol{\beta}_t\| + \|\mathbf{u}\|)\|\mathbf{z}_i\|}\|\mathbf{z}_i\|^3 = o_P(1),
\end{aligned}$$

where the last step is because  $n^{-1}\sum_{i=1}^n \tau_i w_i^{-1}e^{(\|\boldsymbol{\beta}_t\| + \|\mathbf{u}\|)\|\mathbf{z}_i\|}\|\mathbf{z}_i\|^3$  has a bounded mean and a bounded variance and thus it is bounded in probability.  $\square$

## S.6 Proof of Theorem 5

**Proof of Theorem 5.** The over-sampled estimator  $\hat{\boldsymbol{\theta}}_{\text{over}}^{\text{ubc}}$  is the maximizer of

$$\Upsilon_{oc}(\boldsymbol{\theta}) = \frac{1}{1 + \lambda_n} \sum_{i=1}^n \tau_i [(\boldsymbol{\theta} + \mathbf{b}_o)^{\text{T}} \mathbf{z}_i y_i - \log\{1 + e^{\mathbf{z}_i^{\text{T}}(\boldsymbol{\theta} + \mathbf{b}_o)}\}]. \quad (\text{S.34})$$

Thus,  $\sqrt{a_n}(\hat{\boldsymbol{\theta}}_{\text{over}}^{\text{ubc}} - \boldsymbol{\theta}_{nt})$  is the maximizer of  $\gamma_{oc}(\mathbf{u}) = \Upsilon_{oc}(\boldsymbol{\theta}_{nt} + a_n^{-1}\mathbf{u}) - \Upsilon_{oc}(\boldsymbol{\theta}_{nt})$ . By Taylor's expansion,

$$\gamma_{oc}(\mathbf{u}) = \frac{1}{a_n} \mathbf{u}^{\text{T}} \dot{\Upsilon}_{oc}(\boldsymbol{\theta}_{nt}) + \frac{1}{2a_n^2(1 + \lambda_n)} \sum_{i=1}^n \tau_i \phi_i(\boldsymbol{\theta}_{nt} + \mathbf{b}_o + a_n^{-1}\hat{\mathbf{u}})(\mathbf{z}_i^{\text{T}}\mathbf{u})^2, \quad (\text{S.35})$$

where

$$\dot{\Upsilon}_{oc}(\boldsymbol{\theta}) = \frac{\partial \Upsilon_{oc}(\boldsymbol{\theta})}{\partial \boldsymbol{\theta}} = \frac{1}{1 + \lambda_n} \sum_{i=1}^n \tau_i \{y_i - p_i(\alpha_{nt} + b_{o0}, \boldsymbol{\beta}_t)\} \mathbf{z}_i$$

is the gradient of  $\Upsilon_{oc}(\boldsymbol{\theta})$ , and  $\hat{\mathbf{u}}$  lies between  $\mathbf{0}$  and  $\mathbf{u}$ .

Similarly to the proof of Theorem 1, we only need to show that

$$a_n^{-1} \dot{\Upsilon}_{oc}(\boldsymbol{\theta}_{nt}) \longrightarrow \mathbb{N} \left[ \mathbf{0}, \frac{(1 + \lambda)^2 + \lambda}{(1 + \lambda)^2} \mathbb{E} \left\{ \frac{e^{\boldsymbol{\beta}_t^{\text{T}} \mathbf{x}}}{(1 + c_o e^{\boldsymbol{\beta}_t^{\text{T}} \mathbf{x}})^2} \mathbf{z} \mathbf{z}^{\text{T}} \right\} \right], \quad (\text{S.36})$$

in distribution, and for any  $\mathbf{u}$ ,

$$\frac{1}{a_n^2(1 + \lambda_n)} \sum_{i=1}^n \tau_i \phi_i(\boldsymbol{\theta}_{nt} + \mathbf{b}_o + a_n^{-1}\hat{\mathbf{u}}) \mathbf{z}_i \mathbf{z}_i^{\text{T}} \longrightarrow \mathbb{E} \left( \frac{e^{\boldsymbol{\beta}_t^{\text{T}} \mathbf{x}}}{(1 + c_o e^{\boldsymbol{\beta}_t^{\text{T}} \mathbf{x}})^2} \mathbf{z} \mathbf{z}^{\text{T}} \right), \quad (\text{S.37})$$

in probability.

We prove (S.36) first. Let  $\eta_{obi} = (1 + \lambda_n)^{-1} \tau_i \{y_i - p_i(\alpha_{nt} + b_{o0}, \boldsymbol{\beta}_t)\} \mathbf{z}_i$ . We have that

$$\begin{aligned} (1 + \lambda_n) \mathbb{E}(\eta_{obi} | \mathbf{z}_i) &= \mathbb{E}[(1 + \lambda_n y_i) \{y_i - p_i(\alpha_{nt} + b_{o0}, \boldsymbol{\beta}_t)\} | \mathbf{z}_i] \mathbf{z}_i \\ &= [p_i(\alpha_{nt}, \boldsymbol{\beta}_t)(1 + \lambda_n) \{1 - p_i(\alpha_{nt} + b_{o0}, \boldsymbol{\beta}_t)\} \\ &\quad - \{1 - p_i(\alpha_{nt}, \boldsymbol{\beta}_t)\} \{p_i(\alpha_{nt} + b_{o0}, \boldsymbol{\beta}_t)\}] \mathbf{z}_i = 0, \end{aligned}$$

which implies that  $\mathbb{E}(\eta_{obi}) = \mathbf{0}$ . For the conditional variance

$$\begin{aligned} &(1 + \lambda_n)^2 \mathbb{V}(\eta_{obi} | \mathbf{z}_i) \\ &= \mathbb{E}[\{1 + 3\lambda_n y_i + \lambda_n^2 y_i^2\} \{y_i - p_i(\alpha_{nt} + b_{o0}, \boldsymbol{\beta}_t)\}^2 | \mathbf{z}_i] \mathbf{z}_i \mathbf{z}_i^{\text{T}} \\ &= [p_i(\alpha_{nt}, \boldsymbol{\beta}_t)(1 + 3\lambda_n + \lambda_n^2) \{1 - p_i(\alpha_{nt} + b_{o0}, \boldsymbol{\beta}_t)\}^2 \\ &\quad + \{1 - p_i(\alpha_{nt}, \boldsymbol{\beta}_t)\} \{p_i(\alpha_{nt} + b_{o0}, \boldsymbol{\beta}_t)\}^2] \mathbf{z}_i \mathbf{z}_i^{\text{T}} \\ &= \frac{(1 + 3\lambda_n + \lambda_n^2) e^{\alpha_{nt} + \mathbf{x}_i^{\text{T}} \boldsymbol{\beta}_t} + e^{2(\alpha_{nt} + b_{o0} + \mathbf{x}_i^{\text{T}} \boldsymbol{\beta}_t)}}{(1 + e^{\alpha_{nt} + \mathbf{x}_i^{\text{T}} \boldsymbol{\beta}_t})(1 + e^{\alpha_{nt} + b_{o0} + \mathbf{x}_i^{\text{T}} \boldsymbol{\beta}_t})^2} \mathbf{z}_i \mathbf{z}_i^{\text{T}} \\ &= \frac{(1 + 3\lambda_n + \lambda_n^2) e^{\alpha_{nt} + \mathbf{x}_i^{\text{T}} \boldsymbol{\beta}_t} \left(1 + \frac{1 + 2\lambda_n + \lambda_n^2}{1 + 3\lambda_n + \lambda_n^2} e^{\alpha_{nt} + \mathbf{x}_i^{\text{T}} \boldsymbol{\beta}_t}\right)}{(1 + e^{\alpha_{nt} + b_{o0} + \mathbf{x}_i^{\text{T}} \boldsymbol{\beta}_t})^2 \left(1 + e^{\alpha_{nt} + \mathbf{x}_i^{\text{T}} \boldsymbol{\beta}_t}\right)} \mathbf{z}_i \mathbf{z}_i^{\text{T}} \end{aligned}$$

$$\begin{aligned}
&= \frac{(1 + 3\lambda_n + \lambda_n^2)e^{\alpha_{nt} + \mathbf{x}_i^T \boldsymbol{\beta}_t}}{(1 + e^{\alpha_{nt} + b_{o0} + \mathbf{x}_i^T \boldsymbol{\beta}_t})^2} \mathbf{z}_i \mathbf{z}_i^T \{1 + o_P(1)\} \\
&= e^{\alpha_{nt}} (1 + 3\lambda_n + \lambda_n^2) \frac{e^{\mathbf{x}_i^T \boldsymbol{\beta}_t}}{(1 + c_o e^{\mathbf{x}_i^T \boldsymbol{\beta}_t})^2} \mathbf{z}_i \mathbf{z}_i^T \{1 + o_P(1)\},
\end{aligned}$$

where the  $o_P(1)$ 's above are all bounded and the last step is because  $(1 + \lambda_n)e^{\alpha_{nt}} \rightarrow c_o$ . Thus, by the dominated convergence theorem,  $\mathbb{V}(\eta_{obi})$  satisfies that

$$\mathbb{V}(\eta_{obi}) = e^{\alpha_{nt}} \frac{(1 + \lambda)^2 + \lambda}{(1 + \lambda)^2} \mathbb{E} \left\{ \frac{e^{\boldsymbol{\beta}_t^T \mathbf{x}}}{(1 + c_o e^{\boldsymbol{\beta}_t^T \mathbf{x}})^2} \right\} \{1 + o(1)\}, \quad (\text{S.38})$$

which indicates that

$$\frac{1}{a_n^2} \sum_{i=1}^n \mathbb{V}(\eta_{obi}) \rightarrow \frac{(1 + \lambda)^2 + \lambda}{(1 + \lambda)^2} \mathbb{E} \left\{ \frac{e^{\boldsymbol{\beta}_t^T \mathbf{x}}}{(1 + c_o e^{\boldsymbol{\beta}_t^T \mathbf{x}})^2} \mathbf{z} \mathbf{z}^T \right\}. \quad (\text{S.39})$$

Now we check the Lindeberg-Feller condition. Recall that  $\tau = yv + 1$ , where  $v \sim \text{POI}(\lambda_n)$ . We can show that  $\mathbb{E}\{(1 + v)^3\} < 2(1 + \lambda_n)^3$ . For any  $\epsilon > 0$ ,

$$\begin{aligned}
&a_n \epsilon (1 + \lambda_n)^3 \sum_{i=1}^n \mathbb{E} \{ \|\eta_{obi}\|^2 I(\|\eta_{obi}\| > a_n \epsilon) \} \leq (1 + \lambda_n)^3 \sum_{i=1}^n \mathbb{E} (\|\eta_{obi}\|^3) \\
&= n \mathbb{E} [ \|\tau^3 \{y - p(\boldsymbol{\theta}_{nt} + \mathbf{b}_o)\} \mathbf{z}\|^3 ] \\
&= n \mathbb{E} [ p(\boldsymbol{\theta}_{nt}) (1 + v)^3 \|\{1 - p(\boldsymbol{\theta}_{nt} + \mathbf{b}_o)\} \mathbf{z}\|^3 ] + n \mathbb{E} [ \{1 - p(\boldsymbol{\theta}_{nt})\} \|p(\boldsymbol{\theta}_{nt} + \mathbf{b}_o) \mathbf{z}\|^3 ] \\
&\leq 2n(1 + \lambda_n)^3 \mathbb{E} \{ p(\boldsymbol{\theta}_{nt}) \|\mathbf{z}\|^3 \} + n \mathbb{E} \{ \|p(\boldsymbol{\theta}_{nt} + \mathbf{b}_o) \mathbf{z}\|^3 \} \\
&\leq 2n(1 + \lambda_n)^3 e^{\alpha_{nt}} \mathbb{E} (e^{\boldsymbol{\beta}_t^T \mathbf{x}} \|\mathbf{z}\|^3) + n(1 + \lambda_n)^3 e^{3\alpha_{nt}} \mathbb{E} (e^{3\boldsymbol{\beta}_t^T \mathbf{x}} \|\mathbf{z}\|^3) \\
&= (1 + \lambda_n)^3 O(a_n^2).
\end{aligned}$$

This indicates that  $a_n^{-2} \sum_{i=1}^n \mathbb{E} \{ \|\eta_{obi}\|^2 I(\|\eta_{obi}\| > a_n \epsilon) \} = o(1)$ , and thus the Lindeberg-Feller condition holds. Applying the Lindeberg-Feller central limit theorem (Section \*2.8 of van der Vaart, 1998) finishes the proof of (S.36).

No we prove (S.37). Let

$$\Delta_6 \equiv \frac{1}{a_n^2 (1 + \lambda_n)} \sum_{i=1}^n \tau_i \phi_i(\boldsymbol{\theta}_{nt} + \mathbf{b}_o) \mathbf{z}_i \mathbf{z}_i^T = \frac{1}{n} \sum_{i=1}^n \frac{(1 + v_i y_i) e^{\mathbf{x}_i^T \boldsymbol{\beta}_t}}{\{1 + e^{\alpha_{nt} + b_{o0} + \mathbf{x}_i^T \boldsymbol{\beta}_t}\}^2} \mathbf{z}_i \mathbf{z}_i^T. \quad (\text{S.40})$$

Note that

$$\mathbb{E}(\Delta_6) = \mathbb{E} \left\{ \frac{(1 + \lambda_n y) e^{\boldsymbol{\beta}_t^T \mathbf{x}}}{(1 + e^{\alpha_{nt} + b_{o0} + \boldsymbol{\beta}_t^T \mathbf{x}})^2} \mathbf{z} \mathbf{z}^T \right\} \quad (\text{S.41})$$

$$= \mathbb{E} \left\{ \frac{e^{\boldsymbol{\beta}_t^T \mathbf{x}}}{(1 + e^{\alpha_{nt} + \boldsymbol{\beta}_t^T \mathbf{x}})(1 + e^{\alpha_{nt} + b_{o0} + \boldsymbol{\beta}_t^T \mathbf{x}})} \mathbf{z} \mathbf{z}^T \right\} \quad (\text{S.42})$$

$$= \mathbb{E} \left( \frac{e^{\boldsymbol{\beta}_t^T \mathbf{x}}}{1 + c_o e^{\boldsymbol{\beta}_t^T \mathbf{x}}} \mathbf{z} \mathbf{z}^T \right) + o(1), \quad (\text{S.43})$$

by the dominated convergence theorem, and the variance of each component of  $\Delta_6$  is bounded by

$$\begin{aligned}
& \frac{1}{n} \mathbb{E} \left[ \frac{(1 + vy)^2 e^{2\beta_t^T \mathbf{x}}}{\{1 + e^{\alpha_{nt} + b_{o0} + \beta_t^T \mathbf{x}}\}^4} \|\mathbf{z}\|^4 \right] \\
&= \frac{1}{n} \mathbb{E} \left[ \frac{\{1 + (3\lambda_n + \lambda_n^2)p(\boldsymbol{\theta}_{nt})\} e^{2\beta_t^T \mathbf{x}}}{\{1 + e^{\alpha_{nt} + b_{o0} + \beta_t^T \mathbf{x}}\}^4} \|\mathbf{z}\|^4 \right] \\
&\leq \frac{\mathbb{E}(e^{2\beta_t^T \mathbf{x}} \|\mathbf{z}\|^4)}{n} + \frac{e^{\alpha_{nt}} (3\lambda_n + \lambda_n^2)}{n} \mathbb{E}(e^{3\beta_t^T \mathbf{x}} \|\mathbf{z}\|^4) = o(1),
\end{aligned}$$

where the last step is because  $n^{-1} e^{\alpha_{nt}} \lambda_n^2 = (e^{\alpha_{nt}} \lambda_n)^2 a_n^{-2} \rightarrow 0$  and both expectations are finite. Therefore, Chebyshev's inequality implies that  $\Delta_6 \rightarrow 0$  in probability. Thus, (S.37) follows from the fact that

$$\begin{aligned}
& \left| \frac{1}{a_n^2 (1 + \lambda_n)} \sum_{i=1}^n \tau_i \phi_i(\boldsymbol{\theta}_{nt} + \mathbf{b}_o + a_n^{-1} \hat{\mathbf{u}}) \|\mathbf{z}_i\|^2 - \frac{1}{a_n^2 (1 + \lambda_n)} \sum_{i=1}^n \tau_i \phi_i(\boldsymbol{\theta}_{nt} + \mathbf{b}_o) \|\mathbf{z}_i\|^2 \right| \\
&\leq \frac{\|a_n^{-1} \hat{\mathbf{u}}\|}{a_n^2 (1 + \lambda_n)} \sum_{i=1}^n \tau_i p_i(\boldsymbol{\theta}_{nt} + \mathbf{b}_o + a_n^{-1} \hat{\mathbf{u}}) \|\mathbf{z}_i\|^3 \\
&\leq \frac{\|a_n^{-1} \hat{\mathbf{u}}\|}{n} \sum_{i=1}^n (1 + v_i y_i) e^{(\|\beta_t\| + \|\mathbf{u}\|) \|\mathbf{z}_i\|} \|\mathbf{z}_i\|^3 = o_P(1),
\end{aligned}$$

where the last step is from the fact that  $n^{-1} \sum_{i=1}^n (1 + v_i y_i) e^{(\|\beta_t\| + \|\mathbf{u}\|) \|\mathbf{z}_i\|} \|\mathbf{z}_i\|^3$  has a bounded mean and a bounded variance, and an application of Chebyshev's inequality.  $\square$

## References

- Hjort, N. L. and Pollard, D. Asymptotics for minimisers of convex processes. *arXiv preprint arXiv:1107.3806*, 2011.
- van der Vaart, A. *Asymptotic Statistics*. Cambridge University Press, London, 1998.
- Wang, H. More efficient estimation for logistic regression with optimal subsamples. *Journal of Machine Learning Research*, 20(132):1–59, 2019.
